# Supplementary material
Source: Springer Nature journal article supplement (https://www.springermedizin.de/resource/supplementary/40035_2012_13_MOESM1_ESM.pdf/9685402)

**A**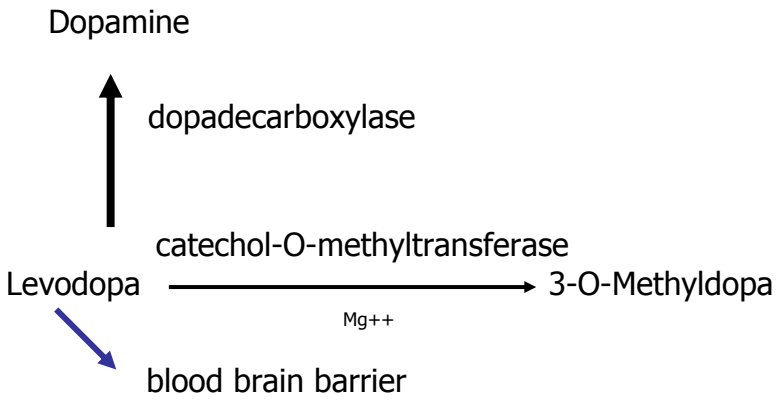**B**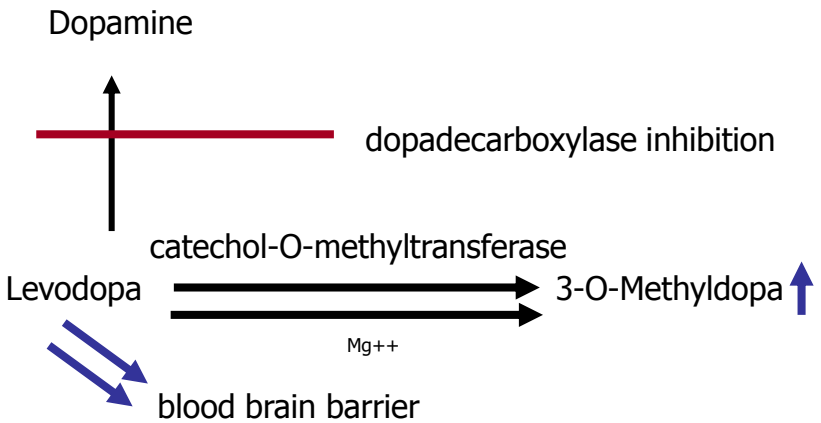**C**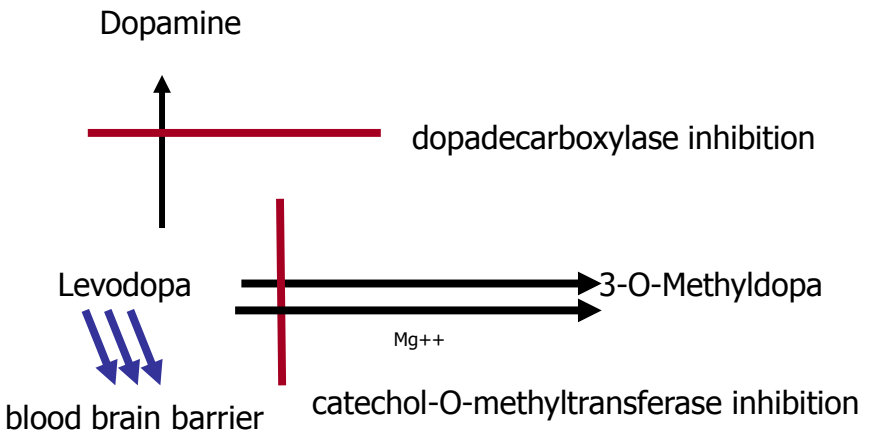

Supplement: MOESM1 [file 9685402]
